# Supplementary material for: Integrated workflow for univariate and multivariate evaluation of batch correction reliability
Source: Research Square preprint supplement (doi:10.21203/rs.3.rs-8158757/v1), 2025-11-27

Supplemental Figure 1: Bivariate dispersion visualizations for different reference compounds, using QCs analyzed within nine batches on a large-scale study. The dot in the figure represents the different quality controls. Each convex hull represents an analytical batch and the covered surface represents the bivariate dispersion.

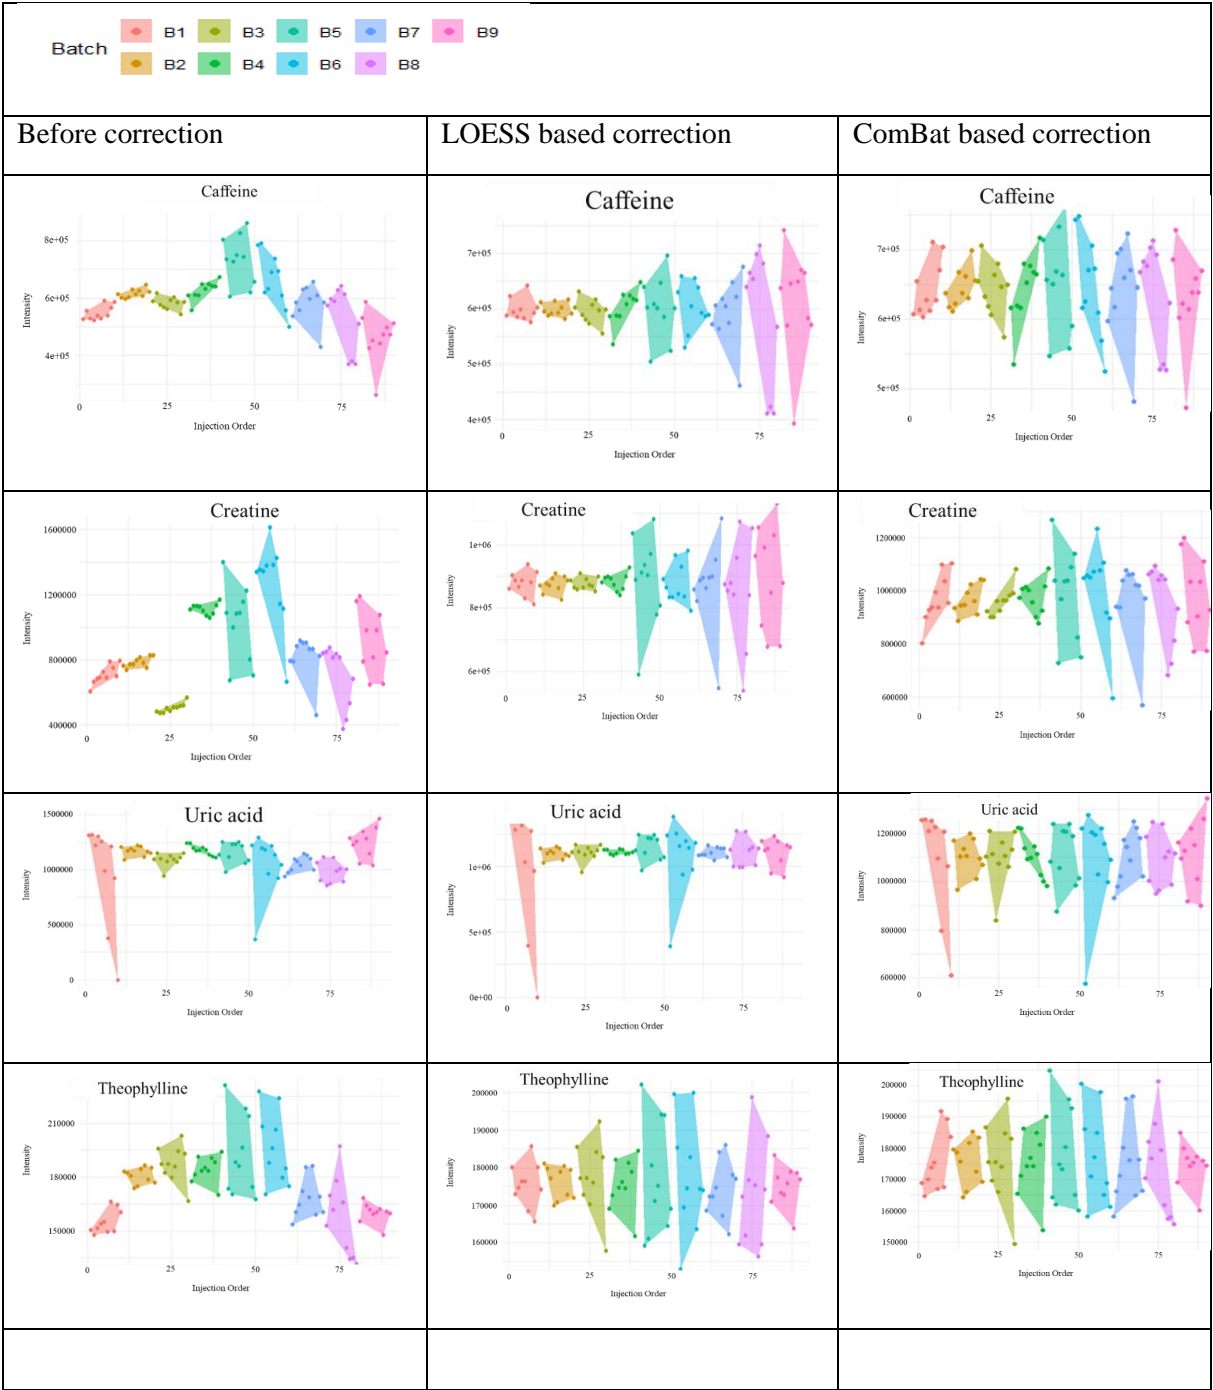

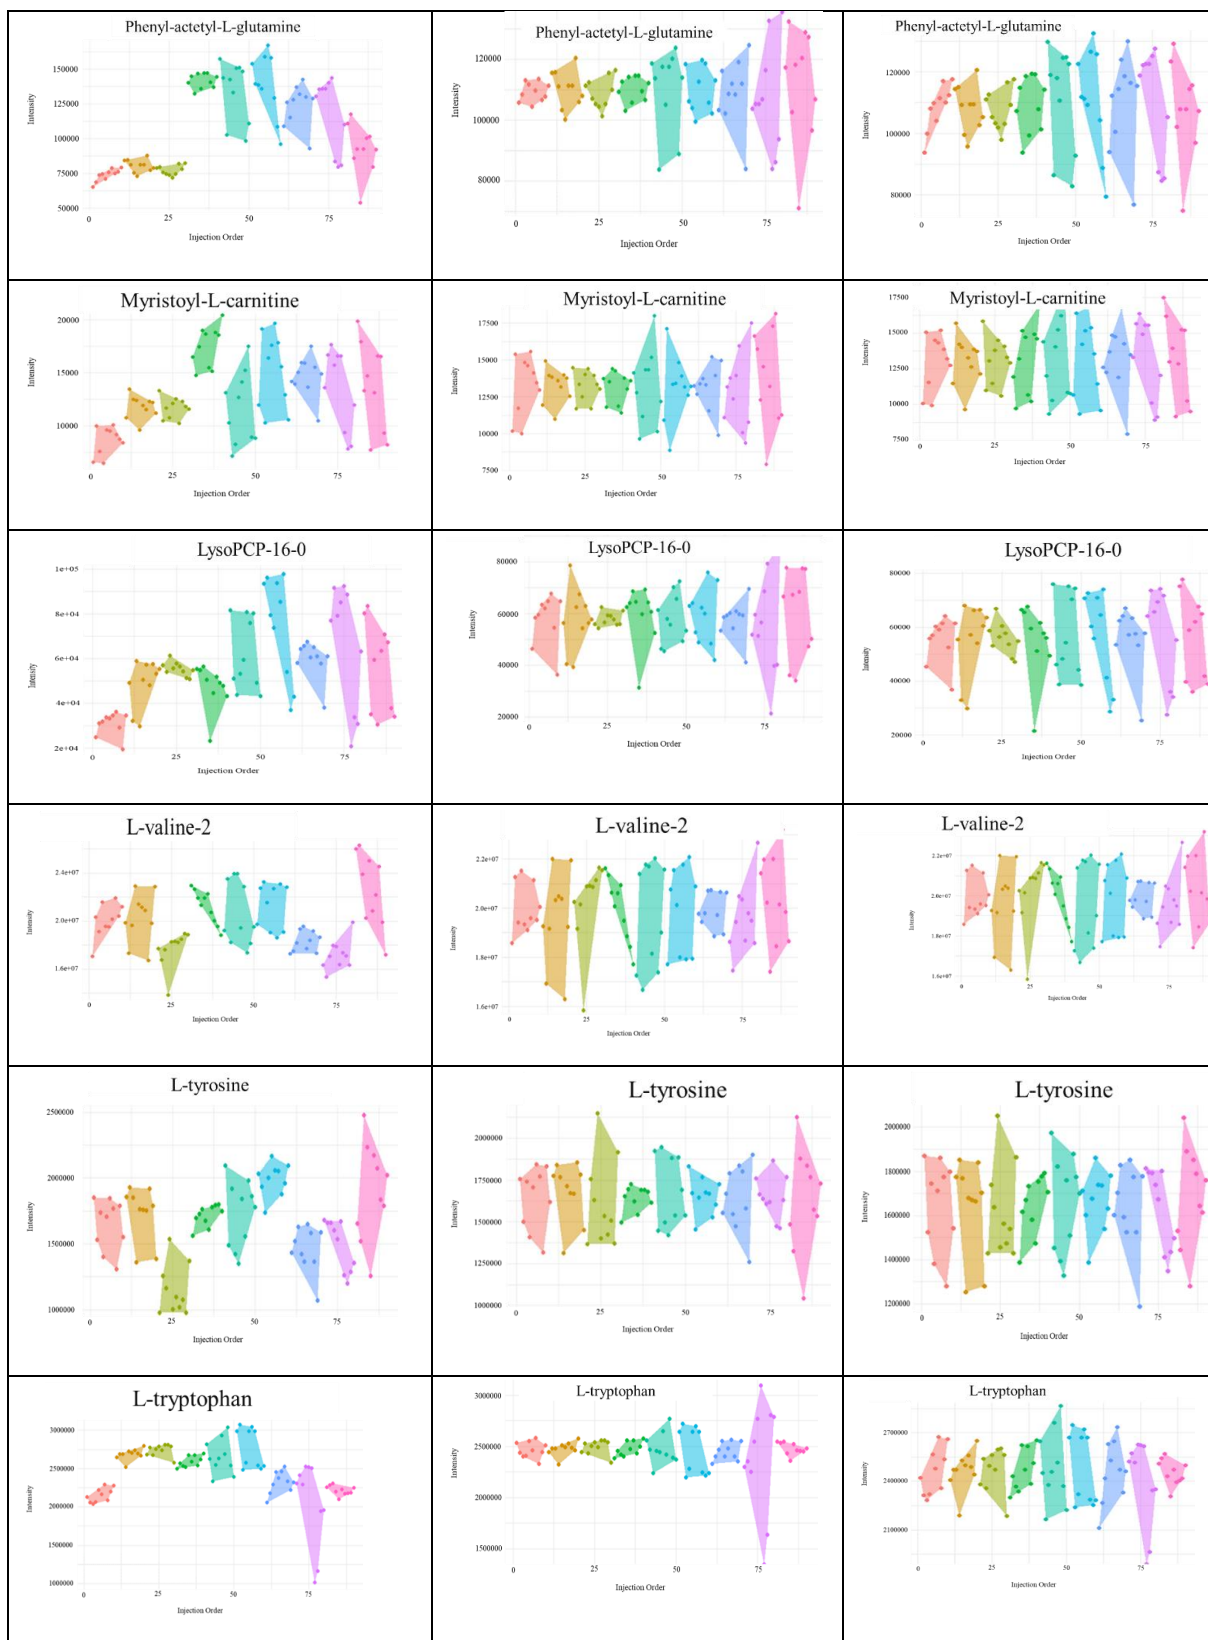

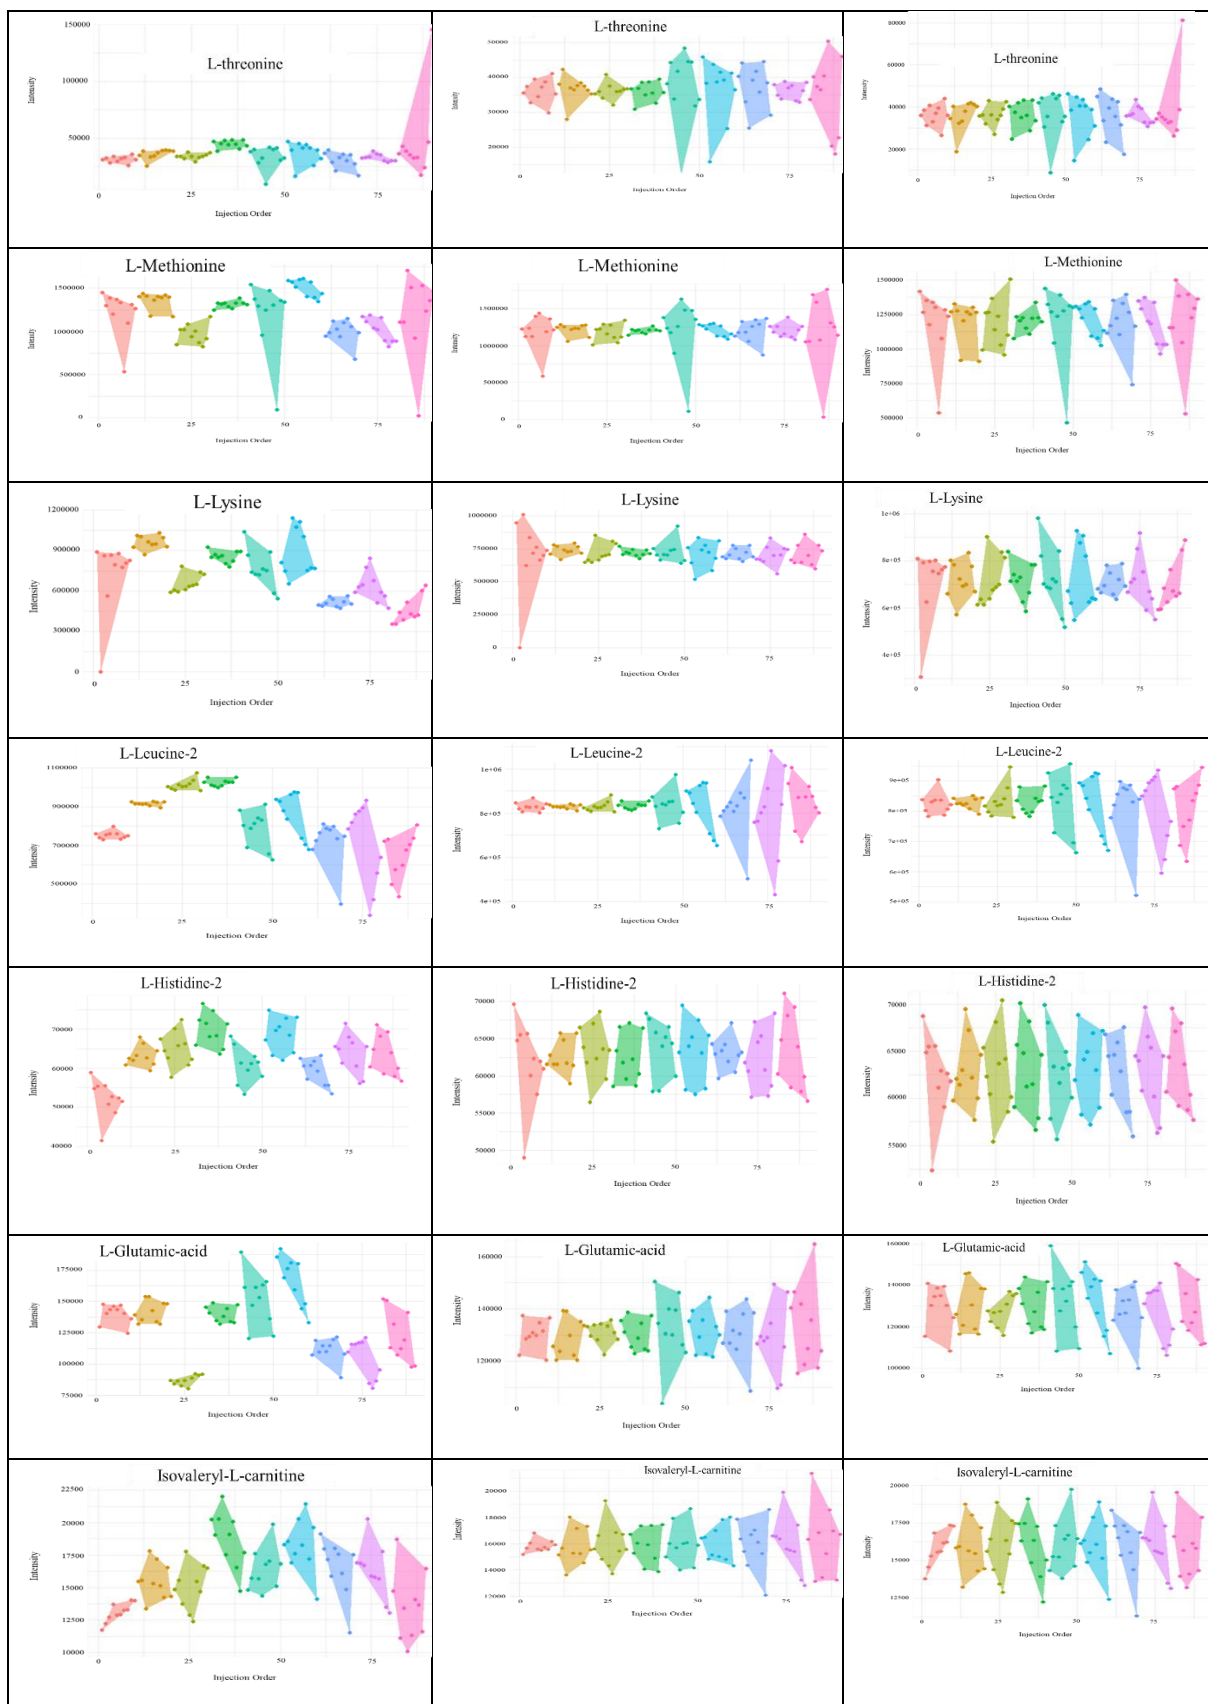

Supplement: Supplementary file [file 47c7d0cbdcf864c963839700.pdf]
